# Supplementary material
Source: PubMed Central journal article supplement (PMC9011165)

## 1. Titel

„Untersuchung der Immunantwort vor/nach COVID-19 Erkrankung oder SARS-CoV-2- Impfung in Dialysepatient\*Innen, Organempfänger\*Innen und medizinischem Personal“

## 2. Zusammenfassung des Projekts

### Synopse:

|                              |                                                                                                                                                                                                                                                                                                                                                                                                                                                                                                                                                                                                                                                                                                                                                                                                        |
|------------------------------|--------------------------------------------------------------------------------------------------------------------------------------------------------------------------------------------------------------------------------------------------------------------------------------------------------------------------------------------------------------------------------------------------------------------------------------------------------------------------------------------------------------------------------------------------------------------------------------------------------------------------------------------------------------------------------------------------------------------------------------------------------------------------------------------------------|
| <b>Titel (deutsch)</b>       | Untersuchung der Immunantwort vor/nach COVID-19 Erkrankung oder SARS-CoV-2- Impfung in Dialysepatient*Innen, Organempfänger*Innen und medizinischem Personal                                                                                                                                                                                                                                                                                                                                                                                                                                                                                                                                                                                                                                           |
| <b>Titel (englisch)</b>      | Study of the immune response before and after COVID-19 disease or SARS-CoV-2 vaccination in dialysis patients, organ recipients, and medical staff                                                                                                                                                                                                                                                                                                                                                                                                                                                                                                                                                                                                                                                     |
| <b>Akronym</b>               | DIA-Vacc                                                                                                                                                                                                                                                                                                                                                                                                                                                                                                                                                                                                                                                                                                                                                                                               |
| <b>Studienleiter</b>         | Prof. Dr. med. Christian Hugo                                                                                                                                                                                                                                                                                                                                                                                                                                                                                                                                                                                                                                                                                                                                                                          |
| <b>Protokoll Version</b>     | V1.1 21/1/2021                                                                                                                                                                                                                                                                                                                                                                                                                                                                                                                                                                                                                                                                                                                                                                                         |
| <b>Primäre Zielsetzung</b>   | <ul style="list-style-type: none"> <li>- Untersuchung des SARS-CoV-2 Immunantwort auf humoraler und zellulärer Ebene bei medizinischem Praxispersonal, Patienten mit kompromitiertem Immunstatus (Dialysepatienten) sowie supprimiertem Immunstatus (Organtransplantierte, zumeist Nieren) möglichst einmalig vor und mehrmalig nach COVID-19 Erkrankung oder SARS-CoV-2-Impfung.</li> </ul>                                                                                                                                                                                                                                                                                                                                                                                                           |
| <b>Sekundäre Zielsetzung</b> | <p>Bei allen Gruppen sollen zusätzlich folgende Parameter im Verlauf erhoben werden:</p> <ul style="list-style-type: none"> <li>- Erhebung der Inzidenz und Prävalenz asymptomatischer SARS-CoV-2-Infektionen.</li> <li>- Differenzierung der Immunität bzgl. einer SARS-CoV-2-Infektion versus SARS-CoV-2-Impfung.</li> <li>- Erfassung der Dauer des Immunitätsnachweises.</li> <li>- Erfassung von relevanten klinischen Verlaufsparemtern wie erneute Inzidenz und Schwere von symptomatischen COVID-19-Erkrankungen, bzw. Fieber, Schüttelfrost, Husten, Kurzatmigkeit, Durchfall, Anosmie und Geschmacksverlust, Allgemeinsymptome, allergischen Reaktionen, Tod.</li> <li>- Erfassung des prozentualen Anteils der SARS-CoV-2 Immunität innerhalb einer Dialysepraxis (Mindestwert).</li> </ul> |
| <b>Einschlusskriterien</b>   | Medizinisches Praxispersonal, Dialysepatient*Innen und Organempfänger*Innen                                                                                                                                                                                                                                                                                                                                                                                                                                                                                                                                                                                                                                                                                                                            |

Prüfplan: Untersuchung der Immunantwort vor/nach COVID-19 Erkrankung oder SARS-CoV-2- Impfung in Dialysepatient\*Innen, Organempfänger\*Innen und medizinischem Personal

|                                                 |                                                                                                                                                                                                                                                                                                                                                                                                                                                                                                                                                                                                                                                                                                                                                                                                                                                                                                                                                                                                              |
|-------------------------------------------------|--------------------------------------------------------------------------------------------------------------------------------------------------------------------------------------------------------------------------------------------------------------------------------------------------------------------------------------------------------------------------------------------------------------------------------------------------------------------------------------------------------------------------------------------------------------------------------------------------------------------------------------------------------------------------------------------------------------------------------------------------------------------------------------------------------------------------------------------------------------------------------------------------------------------------------------------------------------------------------------------------------------|
|                                                 | Einwilligung zur Studienteilnahme                                                                                                                                                                                                                                                                                                                                                                                                                                                                                                                                                                                                                                                                                                                                                                                                                                                                                                                                                                            |
| <b>Ausschlusskriterien</b>                      | Alter < 18 Jahren                                                                                                                                                                                                                                                                                                                                                                                                                                                                                                                                                                                                                                                                                                                                                                                                                                                                                                                                                                                            |
| <b>Ablauf</b>                                   | <ul style="list-style-type: none"> <li>- Blutentnahme von je einem Serumröhrchen (7,5 – 9 ml) zu einem Zeitpunkt vor und/oder nach durchlaufener COVID-19 Erkrankung bzw. vor/nach Beginn einer SARS-CoV-2-Impfung. Die Blutentnahmen nach Erkrankung/Impfung erfolgen ca. 3-4 Wochen, sowie 8±1 Woche und 6 Monate ± 2 Wochen, 9 Monate ± 2 Wochen, 12 ± 1 und 18 ± 1 Monate nach Erkrankung zur Bestimmung der humoralen Immunitätsreaktion bei allen Studienteilnehmern soweit möglich während der klinischen Routine.</li> <li>- Die zelluläre Immunitätsreaktion soll nur in einer Untergruppe von ca. 600 Teilnehmern untersucht werden. Dafür wird zu den gleichen Zeiten 25 ml Blut zusätzlich abgenommen.</li> <li>- Zu allen Zeitpunkten wird ein Fragebogen mit den wichtigsten routinemäßig anfallenden klinischen Befunden insbesondere zu einer COVID-19 Erkrankung erhoben. Zusätzlich werden die numerischen Zentrumsdaten erfasst (Dialysepatienten, Transplantierte, Personal).</li> </ul> |
| <b>Zeitraum der Rekrutierung/Datenerfassung</b> | 15.01.2021-31.12.2022                                                                                                                                                                                                                                                                                                                                                                                                                                                                                                                                                                                                                                                                                                                                                                                                                                                                                                                                                                                        |
| <b>Beteiligte/Rekrutierende Zentren (36)</b>    | <p>Universitätsklinikum Carl Gustav Carus Dresden (leitendes Zentrum) und KfH-Nierenzentrum Dresden;</p> <p>Universitätsklinikum Leipzig und KfH-Nierenzentrum Leipzig</p> <p>Klinikum St. Georg und KfH-Nierenzentrum Leipzig am Klinikum "St. Georg"</p> <p>PHV-Dialysezentrum Dresden Friedrichstadt</p> <p>Nieren-, Hochdruck- und Rheuma-Zentrum Dresden</p> <p>Via medis Nierenzentrum Dresden MVZ GmbH</p> <p>PHV-Dialysezentrum Großenhain</p> <p>Nephrologische Fachambulanz Großenhain</p> <p>Via medis Nierenzentrum Riesa MVZ GmbH</p> <p>PHV-Dialysezentrum Meißen</p> <p>Dialysezentrum Freital</p> <p>Dialyse Heidenau</p> <p>Dialyse- und Nierenambulanz Sebnitz</p> <p>KfH-Nierenzentrum Bischofswerda</p>                                                                                                                                                                                                                                                                                  |

Prüfplan: Untersuchung der Immunantwort vor/nach COVID-19 Erkrankung oder SARS-CoV-2- Impfung in Dialysepatient\*Innen, Organempfänger\*Innen und medizinischem Personal

|                                     |                                                                                                                                                                                                                                                                                                                                                                                                                                                                                                                                                                                                                                                                                                                                                                                                              |
|-------------------------------------|--------------------------------------------------------------------------------------------------------------------------------------------------------------------------------------------------------------------------------------------------------------------------------------------------------------------------------------------------------------------------------------------------------------------------------------------------------------------------------------------------------------------------------------------------------------------------------------------------------------------------------------------------------------------------------------------------------------------------------------------------------------------------------------------------------------|
|                                     | <p>KfH-Nierenzentrum Bautzen</p> <p>Gemeinschaftspraxis Dres. Lüthke/Neubert (Dialysezentrum Löbau)</p> <p>Dialysepraxis Zittau</p> <p>KfH-Nierenzentrum Görlitz</p> <p>Dialyse-Weißwasser</p> <p>Nephrologisches Zentrum Hoyerswerda</p> <p>KfH-Nierenzentrum Finsterwalde</p> <p>PHV-Dialysezentrum Leipzig-Wiederitzsch</p> <p>KfH-Nierenzentrum Markkleeberg</p> <p>Dialyse Borna</p> <p>KfH-Nierenzentrum Grimma</p> <p>Nephrocare Döbeln GmbH</p> <p>Nephrologisches Zentrum Zwickau</p> <p>Gemeinschaftspraxis für Innere Medizin, Nephrologie und Dialyse Rodewisch</p> <p>KfH-Nierenzentrum Aue</p> <p>KfH-Nierenzentrum Plauen</p> <p>KfH-Nierenzentrum Chemnitz</p> <p>Dialysezentrum Chemnitz</p> <p>Dialysezentrum Annaberg</p> <p>Dialysepraxis Freiberg</p> <p>Dialysezentrum Frankenberg</p> |
| <b>Finanzierung</b>                 | Antragstellung öffentlicher Gelder geplant, jedoch noch nicht erfolgt.                                                                                                                                                                                                                                                                                                                                                                                                                                                                                                                                                                                                                                                                                                                                       |
| <b>Förderung (nicht-finanziell)</b> | Projektunterstützung durch Prof. T.H. Lindner (Nephrologie – Universitätsklinikum Leipzig und stellvertretend für das KfH-Leipzig am Universitätsklinikum), Prof J. Beige (Nephrologie – Klinikum St. Georg, Leipzig und stellvertretend für das KfH-Leipzig am Klinikum St. Georg), Dipl.-Med. H. Martin (Nephrologisches Zentrum Zwickau) und Dr. med. H. Schirutschke (PHV Dialysezentrum Dresden Friedrichstadt).                                                                                                                                                                                                                                                                                                                                                                                        |

Prüfplan: Untersuchung der Immunantwort vor/nach COVID-19 Erkrankung oder SARS-CoV-2- Impfung in Dialysepatient\*Innen, Organempfänger\*Innen und medizinischem Personal

|                             |           |
|-----------------------------|-----------|
| <b>Fallzahlabeschätzung</b> | 3000-4000 |
|-----------------------------|-----------|

### 3. Verantwortlichkeiten

#### 3.1. STUDIENLEITER/IN

**Prof. Dr. med. Christian Hugo**

Leiter der Nephrologie  
Medizinische Klinik und Poliklinik III  
Universitätsklinikum Carl Gustav Carus Dresden  
Fetscherstraße 74  
01307 Dresden

#### 3.2. beteiligte Wissenschaftler/innen:

**Prof. Dr. med. Dr. h.c. Torsten Tonn**

Professur für Transfusionsmedizin,  
Ärztlicher Geschäftsführer  
DRK-Blutspendedienst Nord-Ost gemeinnützige GmbH  
Blasewitzer Straße 68 / 70  
01307 Dresden

**Prof. Dr. med. Tom Lindner**

Leiter des Bereichs Nephrologie  
Medizinische Klinik III  
Universitätsklinikum Leipzig  
Liebigstr. 20  
04103 Leipzig

**Prof. Dr. med. Joachim Beige**

Chefarzt der Abteilung Nephrologie  
Klinikum St. Georg  
Delitzscher Str. 141  
04129 Leipzig

**Dr. med. Andreas Karl**

Institutsleiter des Instituts für Transfusionsmedizin Plauen  
Röntgenstraße 2a  
08529 Plauen

**Dr. rer. nat. Marcus Odendahl**

Stellvertretender Leiter des Qualitätskontrolllabors  
Institut für Transfusionsmedizin

Prüfplan: Untersuchung der Immunantwort vor/nach COVID-19 Erkrankung oder SARS-CoV-2- Impfung in Dialysepatient\*Innen, Organempfänger\*Innen und medizinischem Personal

DRK-Blutspendedienst Nord-Ost gemeinnützige GmbH  
Blasewitzer Straße 68 / 70  
01307 Dresden

**Dr. med. Julian Stumpf**

Fachabteilung Nephrologie  
Medizinische Klinik und Poliklinik III  
Universitätsklinikum Carl Gustav Carus Dresden  
Fetscherstraße 74  
01307 Dresden

---

### 3.3. BETEILIGTE EINRICHTUNGEN

- Medizinische Klinik und Poliklinik III, Universitätsklinikum Carl Gustav Carus Dresden, Fetscherstraße 74, 01307 Dresden
- Fachbereich Nephrologie, Medizinische Klinik III, Universitätsklinikum Leipzig, Liebigstraße 18, 04103 Leipzig
- Abteilung für Nephrologie, Klinikum St. Georg, Delitzscher Str. 141, 04129 Leipzig
- DRK-Blutspendedienst Nord-Ost gemeinnützige GmbH, Blasewitzer Straße 68 / 70, 01307 Dresden
- Instituts für Transfusionsmedizin Plauen, Röntgenstraße 2a, 08529 Plauen

---

### 4. Finanzierung

Antragstellung um öffentliche Gelder geplant

---

### 5. Registrierung in einem öffentlich zugänglichen Studienregister:

Mit bewilligtem Ethikvotum ist die Anmeldung in folgenden Registern geplant:

- Deutsches Register für klinische Studien
- Amerikanisches Studienregister clinicaltrials.gov sowie
- Europäisches Studienregister EudraCT oder Europäisches Studienregister (EU Clinical Trials Register)

---

### 6. Wissenschaftlicher Hintergrund

---

#### 6.1. STAND DER FORSCHUNG:

**Chronische Nierenerkrankungen** stellen die Gesundheitssysteme nicht nur vor gewaltige Herausforderungen, da sie hohe Kosten verursachen, sondern sind auch schweregradabhängig mit hoher Mortalität insbesondere aufgrund von kardiovaskulären und infektiologischen Komplikationen assoziiert<sup>1</sup>. Am Ende der chronischen Nierenerkrankung ist eine Nierenersatztherapie notwendig. Prinzipiell sind die Peritonealdialyse, die Hämodialyse

Prüfplan: Untersuchung der Immunantwort vor/nach COVID-19 Erkrankung oder SARS-CoV-2- Impfung in Dialysepatient\*Innen, Organempfänger\*Innen und medizinischem Personal

und die Nierentransplantation (NTx) adäquate Optionen. In Deutschland benötigen deutlich mehr als 100.000 Menschen eine dauerhafte Nierenersatztherapie<sup>2</sup> (Dialyse bzw. Nierentransplantation). Dialyse- und Transplantationspatienten gelten im Rahmen einer COVID-19-Erkrankung als besonders gefährdet für einen schweren Infektionsverlauf mit tödlichem Ausgang und bauen grundsätzlich seltener und abgeschwächt einen Immunschutz nach Impfungen auf.

Das **SARS-CoV-2 (Severe Acute Respiratory Syndrome Corona Virus-2)** verursacht die Covid-19-Erkrankung.

Seit seiner ersten Entdeckung in Wuhan, China im Dezember 2019 hat sich die SARS-CoV-2-Infektion schnell zu einer weltweiten Pandemie entwickelt<sup>3,4</sup>. Bis Mitte Januar 2021 wurden weltweit > 90 Millionen Fälle gemeldet (in Deutschland > 2 Millionen), die zu > 2 Millionen Todesfällen führten (in Deutschland > 46 000). Im Bundesland Sachsen liegt die Prävalenz verglichen mit den gesamtdeutschen Zahlen nahezu doppelt so hoch (bei 8,3 % versus 4,8 %). Die klinischen Symptome, die mit COVID-19 assoziiert sind, sind variabel, obwohl die häufigsten Fieber, Husten, Kurzatmigkeit, Durchfall, Anosmie und Geschmacksverlust sind. Der größte Risikofaktor für einen besonders schweren Verlauf der Erkrankung ist das fortgeschrittene Alter. Aber auch weitere Komorbiditäten wie z.B. Diabetes mellitus, Bluthochdruck, Herz-Kreislauf-Erkrankungen, Lungenerkrankungen, Malignome und Nierenerkrankungen zeigen ein erhöhtes Risiko für eine schwere Erkrankung an<sup>5,6</sup>. Insbesondere ein beschriebener hyperinflammatorischer Zustand (Zytokinsturm-Syndrom genannt) ist mit Multiorganversagen und schlechter Prognose vergesellschaftet<sup>7</sup>. Bei diesen Patienten wurden erhöhte Konzentrationen von zirkulierenden Entzündungszytokinen wie Interleukin (IL)-1, IL-6 und Interferon- $\gamma$  nachgewiesen.

Theoretisch haben **Empfänger von Transplantaten solider Organe** ein besonders hohes Risiko, aufgrund der dauerhaften medikamentösen Immunsuppression eine schwere COVID-19 Erkrankung zu entwickeln. Europäische und US-amerikanische Erfahrungen während der ersten Pandemiewelle von an COVID-19 erkrankten Nierentransplantatempfängern berichteten über eine häufigere rasche Progression von > 75 % der Patienten mit einer Sterblichkeit von 25-28 %<sup>8-10</sup>, die sich aber in späteren, auch eigenen Studien so ausgeprägt nicht mehr bestätigte<sup>11</sup>. Der möglicherweise durch die Immunsuppression behinderte Effekt einer Immunitätsentwicklung gegen SARS-CoV-2 könnte durch positive Effekte der Immunsuppression auf die Entstehung eines hyperinflammatorischen Zustandes unter der COVID-19-Infektion potentiell kompensiert werden. Der Aufbau einer Immunitätslage nach Impfungen ist bei Patienten nach Organtransplantation deutlich eingeschränkt und für eine SARS-CoV-2-Impfung bisher noch nicht untersucht. **Dialysepatienten** sind aufgrund multipler begleitender Komorbiditäten, häufiger unterschwelliger Entzündungsprozesse und des meist fortgeschrittenen Alters immunkompromittiert, aber nicht in gleichem Ausmaß wie Organtransplantierte. Insbesondere die Dauer bis zur Rekonvaleszenz nach respiratorischen Infekten ist bei diesen Patienten deutlich verlängert. Die Entwicklung einer Immunität nach Impfungen, z. B. Hepatitis-Impfung, ist bei Dialysepatienten teilweise verzögert und eingeschränkt, aber für eine SARS-CoV-2-Impfung bisher nicht untersucht. In der internationalen Literatur ist das deutlich erhöhte Mortalitätsrisiko von Dialysepatienten im Rahmen einer Covid-19-Erkrankung gut belegt<sup>12</sup>.

Der Hauptantragsteller hat mit Beginn der ersten SARS-CoV-2-Pandemiewelle im Frühjahr 2020 ein **Netzwerk der 36 nephrologischen Dialysepraxen in Sachsen** etabliert, mit dem wöchentlich die Erkrankungszahlen an COVID-19-Infektionen in den Dialysepraxen zusammengetragen und in ihrer Gesamtheit anonymisiert zurückgespiegelt wurden. Gleichzeitig wurden die Dialysepraxen mit wichtigen Informationen zur Pandemie versorgt, gemeinsame virtuelle Konferenzen organisiert und die Erfassung der Dialysekapazitäten für COVID-19-Patienten in den ostsächsischen Krankenhäusern mitorganisiert. Während nur 2 von 36 Dialysepraxen in Sachsen während der ersten Welle im Frühjahr 2020 zu COVID-19-Hotspots mit ca. 50 Betroffenen wurden, traf die zweite Pandemiewelle trotz wesentlich besserer Vorbereitung die Dialysepraxen und ihre Patienten mit voller Härte. Die gesammelten COVID-19-Krankheitsdaten des sächsischen Dialyse-Netzwerkes innerhalb der zweiten Welle von Mitte Oktober bis jetzt sind in Tabelle 1 (unten) dargestellt: 30 von 36 Dialysepraxen sind jetzt Hotspots mit über 800 COVID-19-erkrankten Patienten, davon sind mit großem Abstand die Dialysepatienten mit 648 Fällen und 111 Todesfällen am schlimmsten betroffen. **Jeder 5. bis 6. betroffene Dialysepatient stirbt an dieser Erkrankung** – das ist mit knapp 20 % eine weit höhere Wahrscheinlichkeit als bei einer altersgematchten Allgemeinbevölkerung. **Zusätzlich zeigen diese Daten, dass unter den Pandemiebedingungen in Sachsen mit einer hohen Durchseuchung**

Prüfplan: Untersuchung der Immunantwort vor/nach COVID-19 Erkrankung oder SARS-CoV-2- Impfung in Dialysepatient\*Innen, Organempfänger\*Innen und medizinischem Personal

**COVID-19-Erkrankungen trotz FFP2-Masken und anderer Hygienemaßnahmen in den meisten Zentren ähnlich den Heimen nicht herausgehalten werden konnten/können.** Außerhalb der Heimstrukturen gibt es sicher keine den Dialysepatienten vergleichbare Population, die 3 Mal pro Woche für jeweils 5 Stunden in einer medizinischen Einrichtung mit vielen anderen Patienten und medizinischem Personal zusammenkommen muss und dann noch so vulnerabel bei erfolgter Infektion ist.

**Tabelle 1: Symptomatische COVID-19 Erkrankungen in allen 36 Dialyseeinrichtungen während der 2. Welle vom 15.10.2020 bis Stand 22.01.2021**

|                                |                            | Pos. Nachweis<br>Sars-CoV-2,<br>nicht kritisch<br>krank | COVID-19,<br>aktuell<br>stationäre<br>Behandlung | Sars-CoV-2,<br>COVID-19<br>ausgeheilt | COVID-19,<br>Patient<br>verstorben |  | Gesamt     |
|--------------------------------|----------------------------|---------------------------------------------------------|--------------------------------------------------|---------------------------------------|------------------------------------|--|------------|
| <b>Gesamt alle Zentren</b>     | <b>Dialyse</b>             | 109                                                     | 49                                               | 379                                   | 111                                |  | 648        |
|                                | <b>Transplantiert</b>      | 5                                                       | 4                                                | 22                                    | 1                                  |  | 32         |
|                                | <b>Pflegepersonal</b>      | 16                                                      | 0                                                | 105                                   | 0                                  |  | 121        |
|                                | <b>Ärztliches Personal</b> | 3                                                       | 1                                                | 15                                    | 0                                  |  | 19         |
|                                | <b>Gesamt</b>              | 133                                                     | 54                                               | 521                                   | 112                                |  | <b>820</b> |
| <b>Zahl betroffene Zentren</b> | <b>30</b>                  |                                                         |                                                  |                                       |                                    |  |            |

Zusätzlich zeigte sich im Transplantationszentrum Dresden in den ersten beiden Januarwochen, dass nach Organangebot zur Transplantation einbestellte, asymptomatische Wartelistenpatienten in drei von vier Einbestellungen diese nach zum Teil 10 Jahren Wartezeit aufgrund eines positiven SARS-CoV-2 PCR Befundes nicht transplantiert werden konnten. Diese Daten zeigen nach unserer Meinung eindeutig, dass die derzeitigen präventiven Massnahmen und die Standarddiagnostik (Testung bei Symptomatik) für ein Dialysezentrum sowohl für die Dialysepatienten als auch für das Dialysepersonal nicht ausreichend sind und dringend durch die Erfassung der Immunitätslage gegen SARS-CoV-2 komplettiert werden müßten, um die Gefahren und besonders - Gefährdeten besser zu erkennen. Aus der hohen Inzidenz des Pflegepersonals im Vergleich zu den Ärzten wird die gegenseitige Ansteckung und Gefährdung der Patienten durch Pflegekräfte besonders offensichtlich, so dass wir gerade bei vermuteter deutlicher Dunkelziffer in Dialysezentren (siehe Transplantationseinbestellung) es für essentiell halten, die Immunitätsreaktionslage zu SARS-CoV-2 nicht nur bei den Patienten sondern auch bei dem Personal wie in unserer Studie im Verlauf zu erfassen. Dieses Vorgehen der erweiterten Immunitäts-Diagnostik wird für Risikogruppierung auch offiziell von der STIKO (siehe RKI-Homepage) empfohlen.

Um die dramatisch erhöhte Sterblichkeit an einer Covid-19-Erkrankung insbesondere in den Hoch-Risiko-Kohorten der Dialysepatienten und Organtransplantierten zu senken und die SARS-CoV-2-Pandemie rascher einzudämmen, stehen als alternativlose Möglichkeit zu den in Dialysepraxen nicht ausreichenden präventiven Massnahmen die neu entwickelten SARS-CoV-2-Impfstoffe zur Verfügung. Vor diesem Hintergrund ist es ein ganz besonders günstiger Umstand für diese Patientenpopulation, dass in Sachsen im Gegensatz zu allen anderen Bundesländern eine klare Priorisierung unabhängig vom Alter für Dialysepatienten durch die entscheidenden Strukturen (SMS, SIKO, DRK, SLÄK) festgelegt wurde und jetzt zu diesem frühen Zeitpunkt eine koordinierte Impfung für SARS-CoV-2 in allen sächsischen Dialysezentren erfolgen kann. Diese wird innerhalb weniger Wochen vollzogen sein und wird neben den Dialysepatienten aus gutem Grund auch das Personal und die Gruppe der zu diesem Zentrum gehörigen transplantierten Patienten umfassen. Ob in dieser Pandemie-Situation durch Erkrankung und Impfung innerhalb

Prüfplan: Untersuchung der Immunantwort vor/nach COVID-19 Erkrankung oder SARS-CoV-2- Impfung in Dialysepatient\*Innen, Organempfänger\*Innen und medizinischem Personal

eines Dialysezentrums die nötige „Herdenimmunität“ erreicht werden kann, ist unklar, aber für die Dialysepatienten bei einer Mortalität von knapp 20% wahrscheinlich überlebenswichtig.

Deshalb wollen wir im Rahmen dieser Beobachtungsstudie die Ausbildung der Immunitätslage unter Pandemie-Erkrankungsbedingungen und jetzt erfolgender SARS-CoV-2-Schutzimpfung in dem Interaktionsgefüge von Patienten und Personal in Dialysepraxen und bei Transplantierten v.a. zum potentiellen Schutz der Patienten untersuchen.

## 6.2. Rationale/Ableitung der Fragestellung:

Die gegenseitige Ansteckung von Personal und Patienten in Dialysezentren (Tabelle 1) mit SARS-Cov-2 ist mit derzeitigen allgemeinen präventiven Methoden nicht vermeidbar und bringt knapp 20% der Dialysepatienten den vorzeitigen Tod. Die regelmäßige Bestimmung der Immunitätsreaktionslage zu SARS-CoV-2 unter Pandemie- und jetzt neu Impfbedingungen kann immune von nicht-immunen Personen/Patienten differenzieren und könnte perspektivisch besonders gefährliche Patienten/Personalkonstellationen erkennen lassen. Latente Infektionen innerhalb des Kosmos eines Dialysezentrums sind unter ausgeprägten Pandemiebedingungen wie in Sachsen vermutlich häufig (siehe Einbestellung zur Transplantation), aber bisher nicht untersucht. Neben den Dialysepatienten sind auch Transplantationspatienten bei COVID-19 Erkrankung besonders für einen gefährlichen Verlauf gefährdet und bilden aufgrund der immunsuppressiven Therapie noch schlechter ausreichende Impfreaktionen aus. Bei Dialysepatienten sind schlechtere Impfreaktionen aus Hepatitis-B-Impfstudien gut belegt.

Aufgrund des erhöhten Risikos für eine schwere SARS-CoV-2-Infektion besteht seit Mitte Januar 2021 in Sachsen die Möglichkeit für alle Dialysepatient\*innen, Organempfänger\*innen und das betreuende medizinische Personal, – unabhängig von der vorliegenden Studie – sich gegen einen SARS-CoV-2-Infektion impfen zu lassen. Für immunkompromittierte Dialysepatient\*innen und immunsupprimierte Organempfänger\*innen wurde die Ausbildung einer spezifische Immunantwort bisher nicht untersucht. Die begleitende Untersuchung der Immunitätsentwicklung dieser Gruppen im Verlauf der Pandemie mit/ohne Impfung ohne Einflußnahme auf den individuellen Verlauf ist Gegenstand dieser Beobachtungsstudie.

Aktuelle Forschungsergebnisse stellen dar, dass sowohl die Antikörper-Antwort (humorale Immunität, vermittelt über die B-Lymphozyten) als auch die T-Zell-Antwort (zelluläre Immunität, vermittelt über die T-Lymphozyten) für die Abwehr einer SARS-CoV-2-Infektion wichtig sind. Die hohe Anfälligkeit des Menschen für eine Infektion mit dem SARS-CoV-2-Virus spiegelt die Neuartigkeit des Virus und die begrenzte, bereits vorhandene B-Zell-Immunität wider. Anhand der Untersuchung der humoralen Aktivität kann eine Impfreaktion von einer durchgemachten SARS-CoV-2-Infektion unterschieden werden. Dabei helfen spezifische Immunglobulin G (IgG)-Antikörper gegen die S1-Untereinheit des SARS-CoV-2-Spike-Proteins, gegen die neuartige Rezeptorbindungsdomäne (RBD, Neutralisierende Spezifität) und S2-Untereinheit und das Nukleokapsid [N]. Gegen die letzteren zwei Spezifitäten können nur SARS-CoV-2-Virus-exponierte Personen IgG-Antikörper entwickeln, so dass mit diesen Messungen Infektion und Impfung differenziert werden können<sup>13</sup>. Zu allen Studienzeitpunkten werden daher ausgehend von einem quantitativen SARS-CoV-2-Antikörperscreeningtest für SARS-CoV-2-Gesamt-IgG-Antikörper zusätzlich Reaktivität gegen das Nukleokapsid untersucht werden, um die Impfantwort von einer möglicherweise zwischenzeitlich oder zuvor durchgemachten COVID-19 Infektion unterscheiden zu können. Im Fall einer positiven Antikörperreaktivität wird dann noch die neutralisierende Aktivität dieser Antikörper mittels Bindung an die Rezeptorbindungsdomäne bestimmt. Bei fehlender Entwicklung von IgG-Antikörpern im Rahmen der Impfung oder Infektion kann gezielt ein Antikörperscreening auf SARS-CoV-2-spezifische IgM-Antikörper durchgeführt werden, um bei diesen Patienten individuelle oder gruppenspezifische Defizite im IgM/IgG-Klassenswitch erkennen zu können.

Aktuelle wissenschaftliche Meinung ist, dass beide Immunachsen, sowohl die IgG-Antikörper gegen das SARS-CoV-2-Spike-Protein (S1) als auch spezifische, langlebige T-Lymphozyten (CD4+-T-Zellen) eine wichtige Rolle bei der Virusneutralisierung spielen. Mittels SARS-CoV-2-Interferon- $\gamma$ -Release-Assays (IGRA) kann aus Vollblut durch Messung des Entzündungszytokins Interferon- $\gamma$ , welches bei Viruskontakt durch die T-Zellen freigesetzt wird, eine T-Zell-Immunität nachgewiesen werden<sup>14</sup>. Zusätzlich soll zur exakteren Bestimmung der T-Zell Immunität gegen



Prüfplan: Untersuchung der Immunantwort vor/nach COVID-19 Erkrankung oder SARS-CoV-2- Impfung in Dialysepatient\*Innen, Organempfänger\*Innen und medizinischem Personal

SARS-CoV-2 bzw. Impfung eine PBMC-Zellisolation mit hochauflösender Untersuchung der spezifischen CD4- bzw. CD8-vermittelten T-Zellimmunität in einer Untergruppe von 600 der Patienten erfolgen<sup>15</sup>. Diese Messung ist sehr aufwendig und zeitintensiv und kann nicht routinemäßig bei allen Patienten vollzogen werden. Durch die Messung der humoralen und zellulären Antwort wird ein umfangreiches Bild zur Beurteilung der Immunantwort auf eine SARS-CoV-2-Impfung und COVID-19-Infektion erzeugt. Insbesondere bei schwach und stark immunsupprimierten Patienten kann so die Krankheits-bedingte Immunitätsentwicklung und/oder der Impferfolg und -schutz deutlich besser eingeschätzt und mit dem klinischen Verlauf korreliert werden.

---

## 7. Projektziele

---

### 7.1. PRIMÄRE ZIELE:

1. Begleitende Untersuchung des SARS-CoV-2 Immunschutzes auf humoraler und zellulärer Ebene bei dem Dialysepatienten betreuenden Personal, Dialysepatienten mit kompromitiertem Immunstatus sowie Organtransplantierte mit supprimiertem Immunstatus möglichst einmalig vor und mehrmalig nach COVID-19 Erkrankung oder SARS-CoV-2-Impfung in sächsischen nephrologischen Zentren/Dialysepraxen. Beurteilt werden soll das Vorhandensein und die Entwicklung einer Erkrankungs- und/oder Impfung-spezifischen humoralen und zellulären Immunitätsreaktion gegen COVID-19 im Verlauf eines Zeitraumes bis zu 18 Monate nach Einschluß.
2. Vor Erkrankungs- / Impfungsbeginn, sowie 3-4 Wochen, 2, 6, 9, 12 und 18 Monate nach Impfung wird den Teilnehmer\*Innen Blut abgenommen.
3. Bei allen Studienteilnehmer\*Innen wird die humorale (Antikörper) Antwort auf die Impfung untersucht. Da auch asymptomatische SARS-CoV-2-Infektionen vorkommen wird dabei ein Panel an unterschiedlichen IgG-Antikörpern gemessen (gegen die S1-Untereinheit des SARS-CoV-2-Spike-Proteins, gegen die neuartige Rezeptorbindungsdomäne (RBD) und S2-Untereinheit und das Nukleokapsid [N]).
4. Bei einem Teil der Studienteilnehmer soll darüber hinaus noch die T-Zell-Immunität mittels SARS-CoV-2-Interferon- $\gamma$ -Release-Assays (IGRA), ELISpot und Durchflusszytometrie gemessen werden. Da die Aufbereitung des Blutes vor Messung technisch komplex ist und nicht an allen Zentren erfolgen kann wird diese Analyse voraussichtlich nur in Dresden bei insgesamt ca. 600 Teilnehmern durchgeführt.
5. Zu allen Zeitpunkten wird mittels eines Fragebogens eine Covid-19-Symptomatik, akute Erkrankungen und insbesondere Infektionen, Nikotin- und Alkoholabusus, sowie die aktuelle Medikation abgefragt (insbesondere Immunsuppressiva). Einmalig werden zu Beginn die Dauerdiagnosen, Allergien sowie die letzte Influenza-Impfung und das Ansprechen auf die Hepatitis-Impfung beim Dialysepatienten abgefragt sowie die genaue Bezeichnung des verwendeten SARS-Cov-2-Impfstoffs.

---

### 7.2. SEKUNDÄRE ZIELE:

1. Erhebung der Inzidenz und Prävalenz asymptomatischer SARS-CoV-2-Infektionen.
2. Differenzierung der Immunität bzgl. einer SARS-CoV-2-Infektion versus SARS-CoV-2-Impfung.
3. Erfassung der Dauer des Immunitätsnachweises.
4. Erfassung von relevanten klinischen Verlaufsparemtern wie erneute Inzidenz und Schwere von symptomatischen COVID-19-Erkrankungen, bzw. Fieber, Schüttelfrost, Husten, Kurzatmigkeit, Durchfall, Anosmie und Geschmacksverlust, Allgemeinsymptome, allergischen Reaktionen, Tod.
5. Erfassung des prozentualen Anteils der SARS-CoV-2 Immunität innerhalb einer Dialysepraxis (Mindestwert).

---

#### 7.3.1 PRIMÄRE ZIELGRÖßEN

Prüfplan: Untersuchung der Immunantwort vor/nach COVID-19 Erkrankung oder SARS-CoV-2- Impfung in Dialysepatient\*Innen, Organempfänger\*Innen und medizinischem Personal

1. SARS-CoV-2 Inzidenzen und Prävalenzen bei Dialysepatient\*Innen, Organempfänger\*Innen sowie dem medizinischen Personal vor/während und nach SARS-CoV-2-Erkrankung oder -Impfung.
2. IgG-Antikörper Titer gegen die Spezifitäten S1-Untereinheit des SARS-CoV-2-Spike-Proteins, die neuartige Rezeptorbindungsdomäne (RBD) und S2-Untereinheit und das Nukleokapsid [N]).
3. Messung des Interferon- $\gamma$  im Zellüberstand nach Inkubation von frischem Vollblut mittels „Enzym-Linked-Immuno-Sorbent-Assay“, ELISpot und mittels CD4/CD8 vermittelte T-Zell Immunität gegen SARS-CoV-2 mittels Durchflusszytometrische Bestimmung.

---

### 7.3.2. SEKUNDÄRE ZIELGRÖÖE:

1. Korrelation der gemessenen IgG-Antikörpertiter und T-Zell-Aktivierung zu asymptomatischen SARS-CoV-2-Neu-Infektionen durch Vergleich der intraindividuellen IgG-Antikörperantwort.
2. Differenzierung der Immunität bzgl. einer SARS-CoV-2-Infektion versus SARS-CoV-2-Impfung mittels Vergleich der Antikörperreaktivitätsspezifität gegen das Spike S1 Protein (Impfung plus Erkrankung) versus des Nukleokapsidprotein (Erkrankungs-spezifisch).
3. Dauer des Nachweises einer SARS-Cov-2 spezifischen Humoralen und/oder T-zellulären Immunantwort.
4. Erhebung typischer Symptome und die COVID-19 Erkrankungs-, Hospitalisierungs-, und Verlegungsrate auf Intensivstation, sowie Mortalität bei Auftreten von Neu-Infektionen vor/nach Erkrankung, Impfung bzw. im Impfintervall.
5. Erfassung des prozentualen Anteils der SARS-CoV-2 Immunität innerhalb einer Dialysepraxis (Mindestwert) durch Praxis-spezifische Relation der Anzahl der Immunitäts-positiven Patienten mit der Anzahl an Dialysepatienten plus Personal.

---

## 8. Studienpopulation

---

### 8.1. EIN- UND AUSSCHLUSSKRITERIEN

#### **Einschlusskriterien:**

- Alle Dialysepatient\*Innen, Organempfänger\*Innen und das medizinische Personal welches sich an dem jeweiligen nephrologischen Zentrum gegen SARS-CoV-2 impfen lässt.
- Einwilligung nach Aufklärung der Teilnehmer\*Innen.

#### **Ausschlusskriterien:**

- Alter < 18 Jahre

---

### 8.2. ANZAHL DER STUDIENTEILNEHMER

Die teilnehmenden sächsischen nephrologischen Zentren betreuen insgesamt ca. 3500-4000 Dialysepatient\*Innen und 500-800 Organempfänger\*Innen (zumeist Nierentransplantierte). Hinzu kommen ca. 500 vom medizinischen Personal. Wir haben bereits eine Zusage von 25 Zentren und gehen von einer Beteiligung von maximal 70% vom Gesamtbestand einer Dialysepraxis aus. Innerhalb von ca. 6 Monaten sollen insgesamt 3000-4000 Teilnehmer\*Innen eingeschlossen werden.

---

### 8.3. REKRUTIERUNGSMABNAHMEN (WO UND WIE WERDEN DIE TEILNEHMER REKRUTIERT?)

Prüfplan: Untersuchung der Immunantwort vor/nach COVID-19 Erkrankung oder SARS-CoV-2- Impfung in Dialysepatient\*Innen, Organempfänger\*Innen und medizinischem Personal

Ziel ist die Rekrutierung von ca. 2000 Dialysepatient\*innen, ca. 600 Organempfänger\*innen und ca. 300 aus dem betreuenden medizinischen Personal an den sächsischen nephrologischen Zentren aus dem bestehenden sachsenweiten Dialysezweck von insgesamt 36 Einrichtungen. Wir rechnen mit einer notwendigen Teilnahme von ca. 20 - 25 Zentren.

---

## 9. Methodik und Durchführung

Multizentrisch angelegte prospektive Observationsstudie (Teilnehmende Studienzentren unter 16.1. Liste beteiligter Einrichtungen:)

---

### 9.1. VERFAHREN ZUR AUFKLÄRUNG UND EINHOLUNG DER EINWILLIGUNG

Geplante Teilnehmer\*Innen an der sächsischen SARS-CoV-2-Impfung werden an ihrem nephrologischen Zentrum vor Durchführung der Impfung aufgeklärt. Die Möglichkeit zur Teilnahme an der Studie wird angeboten. Sollte eine Zustimmung vorliegen, erfolgt die Information und Aufklärung zur Studienteilnahme in schriftlicher Form durch das jeweils beteiligte ärztliche Personal.

---

### 9.2. BESCHREIBUNG DER DATENQUELLEN:

- Laborwerte
- Pseudonymisierte elektronische Prüfbogen (eCRF) welche durch das betreuende medizinische Personal in den jeweiligen nephrologischen Zentren mit Daten aus Patientenakten, ärztliche Epikrisen sowie durch Anamneseerhebung gefüllt werden.

---

### 9.3. AUFLISTUNG/BESCHREIBUNG DER ZU ERFASSENDEN DATEN

1. Numerische Zentrumsdaten: Anzahl Dialysepatienten, Personal, Transplantierte. Anzahl COVID-Erkrankungen.
2. Dialysepatient\*Innen:
  - Labor: 1 Serumröhrchen (7,5 - 9ml) zu den Zeitpunkten vor/ohne COVID-19 Erkrankung bzw. Impfung (T0). Dann nach COVID-Erkrankung/Impfung: 3-4 Wochen (T1), 8 Wochen (T2), sowie 6 (T3), 9 (T4), 12 (T5) und 18 (T6) Monate. Bei ca. 200 Teilnehmer\*Innen zusätzlich zu allen Zeitpunkten 25 ml Lithium-Heparin-Blut bzw. CPT-Vacutainer zur Zellisolation.
  - Biometrische Daten zu T0: Alter, Geschlecht, Körpergröße, Gewicht, Erstdialyse, Dialyseart, Vortransplantationen, Influenza-Impfung 2020, Impfansprechen Hepatitis B, Art des SARS-CoV-2-Impfstoffs, Allergien
  - Diagnosen T0: Grunderkrankung, chronische Erkrankungen welche einer Dauer-Therapie bedürfen
  - Medikamentenanamnese T0: Insbesondere immunsuppressive Medikation
  - Drogenabusus T0: Nikotin, Alkohol
  - Covid-Anamnese T0-6: Husten, Kopfschmerzen, Fieber, Geruchs-/Geschmacksstörungen, Exanthem, Diarrhöen, Gliederschmerzen, andere Beschwerden, positive SARS-CoV-2-Testung mit Datum
3. Organempfänger\*Innen:
  - Labor T0-6: 1 Serumröhrchen (7,5 - 9ml). Bei ca. 200 Teilnehmer\*Innen zusätzlich zu allen Zeitpunkten 25 ml Lithium-Heparin-Blut bzw. CPT-Vacutainer zur Zellisolation.

Prüfplan: Untersuchung der Immunantwort vor/nach COVID-19 Erkrankung oder SARS-CoV-2- Impfung in Dialysepatient\*Innen, Organempfänger\*Innen und medizinischem Personal

- Biometrische Daten T0: Alter, Geschlecht, Körpergröße, Gewicht, Vortransplantationen, Dialysezeit vor Transplantation, Z. n. schweren viralen Infekten, BK-Virusinfektionen, Influenza-Impfung 2020, Impfansprechen Hepatitis B, Art des SARS-CoV-2-Impfstoffs, Allergien
  - Diagnosen T0: Grunderkrankung, chronische Erkrankungen welche einer Dauer-Therapie bedürfen
  - Medikamentenanamnese T0: Insbesondere immunsuppressive Medikation
  - Drogenabusus T0: Nikotin, Alkohol
  - Covid-Anamnese T0-6: Husten, Kopfschmerzen, Fieber, Geruchs-/Geschmacksstörungen, Exanthem, Diarrhöen, Gliederschmerzen, andere Beschwerden, positive SARS-CoV-2-Testung mit Datum
4. Medizinisches Personal:
- Labor T0-6: 1 Serumröhrchen (7,5 - 9ml. Bei ca. 200 Teilnehmer\*Innen zusätzlich zu allen Zeitpunkten 25 ml Lithium-Heparin-Blut bzw. CPT-Vacutainer zur Zellisolation.
  - Biometrische Daten T0: Alter, Geschlecht, Körpergröße, Gewicht, Z. n. schweren viralen Infekten, Influenza-Impfung 2020, Impfansprechen Hepatitis B, Art des SARS-CoV-2-Impfstoffs, Allergien
  - Diagnosen T0: Grunderkrankung, chronische Erkrankungen welche einer Dauer-Therapie bedürfen
  - Medikamentenanamnese T: Insbesondere immunsuppressive Medikation
  - Drogenabusus T0: Nikotin, Alkohol, andere Drogen
  - Covid-Anamnese T0-6: Husten, Kopfschmerzen, Fieber, Geruchs-/Geschmacksstörungen, Exanthem, Diarrhöen, Gliederschmerzen, andere Beschwerden, positive SARS-CoV-2-Testung mit Datum

---

#### 9.4. DATENAUSWERTUNG

Die Durchführung der Analysen erfolgt auf rein wissenschaftlicher Basis. Die Einsichtnahme der Ergebnisse ist den rekrutierenden Wissenschaftlern (Ärzten/Ärztinnen) für die von ihnen rekrutierten Teilnehmer\*Innen möglich. Den Wissenschaftlern ist es möglich bei Einwilligung der Studienteilnehmer\*Innen diese zu kontaktieren und nach Ermessen weitere Schritte in die Wege zu leiten, falls die Ergebnisse der wissenschaftlichen Untersuchung dies nahelegen. An dieser Stelle wird darauf hingewiesen, dass die Verantwortung über die Interpretation der Ergebnisse, Kontaktaufnahme zu den Studienteilnehmern und Information über weitere Schritte bei den vor Ort betreuenden Wissenschaftlern liegt und dann nicht mehr bei dem leitenden Studienzentrum in Dresden. Eine Ausnahme bilden die durch das leitende Studienzentrum Dresden rekrutierten Studienteilnehmer, welche durch die dortigen Wissenschaftler ggf. kontaktiert und informiert werden.

---

#### 9.5. VORAUSSICHTLICHES ENDE DER DATENERFASSUNG

Voraussichtliches Ende der Datenerfassung: 31.12.2022

---

### 10. Nutzen-Risiko-Abwägung

- Mit der Studienteilnahme verbundener individueller Nutzen: Mit der Studienteilnahme ist kein direkter individueller Nutzen verbunden. Die Teilnehmenden erhalten keine finanzielle oder anderweitige Aufwandsentschädigung. Indirekter Nutzen kann potentiell aus der Kenntnis der individuellen oder generellen („Herdenimmunität“) Immunitätslage von Patienten und Personal hinsichtlich der Organisation der Praxisstruktur entstehen, um gefährliche Personal-Patienten-Interaktionen zu minimieren.
- Mit der Studienteilnahme verbundene Belastungen und Risiken: Für die prospektive Studienteilnahme entsteht eine zeitliche Belastung für Aufklärungen (z.B. zur Studienteilnahme) sowie die Notwendigkeit zur Abgabe von Blutproben, die zumeist im Rahmen von Routinekontrollen erfolgen werden. Biometrische Daten werden aus

Prüfplan: Untersuchung der Immunantwort vor/nach COVID-19 Erkrankung oder SARS-CoV-2- Impfung in Dialysepatient\*Innen, Organempfänger\*Innen und medizinischem Personal

Routineuntersuchungen bzw. Krankenakten gewonnen (hier zu nennen insbesondere Diagnosen und Therapiezeiträume sowie die Dauermedikation und der generelle Impfstatus).

- Statement zur ärztlichen Vertretbarkeit: Für die Ärzte entsteht kein unmittelbarer Nutzen außerhalb der Kenntnisse über die Immunitätslage zu SARS-CoV-2 innerhalb der Praxis Populationen. Die zu erwartenden Ergebnisse rechtfertigen aus ärztlicher Sicht den absehbaren Aufwand.

---

### **11. Biometrie/Statistik**

Zur statistischen Analyse werden die jeweils zum Vortermin bzw. ersten Studienzeitpunkt (T0) gemessenen IgG-Antikörper-Antworten der verschiedenen Gruppen analysiert und in ordinal- oder intervall-skalierte Kategorien eingeordnet. In analoger Weise wird die SARS-CoV-2 spezifische T-Zell-Aktivität entsprechend kategorisiert ausgewertet. Auf Basis der Daten sollen auch die Daten Dialysezentrums-spezifisch ausgewertet werden, ob sich z.B. im Laufe der Zeit eine Quote vergleichbar einer „Herdenimmunität“ ausbildet. Zusätzlich soll über den Studienzeitraum die Inzidenz und Prävalenz der SARS-CoV-2-Infektion in den verschiedenen Studienpopulationen errechnet werden. Durch Erhebung der Dialyseart und Dauer sowie des Ausmaßes der Immunsuppression bei den Organempfänger\*Innen sollen zudem mögliche Risikofaktoren für eine Infektion bzw. schweren Verlauf oder eine mangelnde Immunitätsentwicklung identifiziert werden.

---

### **12. Datenmanagement und Datenschutz**

- Erfassung, Speicherung (Art, Ort, Dauer) und Weitergabe von Daten, Gewährleistung der Datensicherheit:
  - Die Erfassung der Daten erfolgt schriftlich an den jeweiligen beteiligten Einrichtungen durch die vor Ort beteiligten Wissenschaftler und Studienärzte
  - Die Daten werden durch die rekrutierenden Studienzentren erfasst und von diesen pseudonymisiert. Die Übermittlung der Daten erfolgt in pseudonymisierter Form an das leitende Studienzentrum des Carl Gustav Carus Universitätsklinikums Dresden.
  - Eine Weitergabe von Daten an Dritte ist nicht vorgesehen. Die erfassten Daten werden für einen Zeitraum von mindestens 10 Jahren archiviert. Für die Archivierung der Daten steht ein abschließbarer Raum mit abschließbaren Schränken zu Verfügung.
- Die Serumproben dürfen nur für den der Untersuchung der Immunantwort und primär zur Antikörperbestimmung verwendet werden. Hierfür nicht genutzte Bestandteile/Reste der Serumprobe werden je nach ausgewählter Option der Teilnehmer\*Innen in Aliquots aufgeteilt und späteren erweiterten Analysen zugeführt oder vernichtet. Ebenso verhält es sich mit dem Lithium-Heparin-Blut zur T-Zell-Analyse.
- Mit der Studienaufklärung werden die Studienteilnehmer\*Innen darüber informiert, dass ein Widerruf zur Studienteilnahme sowie Datenlöschung jederzeit erfolgen kann und erhält hierzu eine entsprechende Kontaktinformation, unter welcher er dies ohne Angabe von Gründen veranlassen kann.

---

### **13. Unterschriften: Studienleiter/in (Antragsteller)**

Prof. Dr. med. Christian Hugo

Prüfplan: Untersuchung der Immunantwort vor/nach COVID-19 Erkrankung oder SARS-CoV-2- Impfung in Dialysepatient\*Innen, Organempfänger\*Innen und medizinischem Personal

#### 14. Referenzen:

1. Hill NR, Fatoba ST, Oke JL, et al. Global Prevalence of Chronic Kidney Disease – A Systematic Review and Meta-Analysis. Remuzzi G, ed. *PLoS One*. 2016;11(7):e0158765. doi:10.1371/journal.pone.0158765
2. Potthoff F, Münscher DC, Weber W GD. *Jahresbericht 2017 Zur Qualität in Der Dialyse.*; 2017.
3. Zhou F, Yu T, Du R, et al. Clinical course and risk factors for mortality of adult inpatients with COVID-19 in Wuhan, China: a retrospective cohort study. *Lancet*. 2020;395(10229):1054-1062. doi:10.1016/S0140-6736(20)30566-3
4. Huang C, Wang Y, Li X, et al. Clinical features of patients infected with 2019 novel coronavirus in Wuhan, China. *Lancet*. 2020;395(10223):497-506. doi:10.1016/S0140-6736(20)30183-5
5. Richardson S, Hirsch JS, Narasimhan M, et al. Presenting Characteristics, Comorbidities, and Outcomes among 5700 Patients Hospitalized with COVID-19 in the New York City Area. *JAMA - J Am Med Assoc*. 2020;323(20):2052-2059. doi:10.1001/jama.2020.6775
6. Cummings MJ, Baldwin MR, Abrams D, et al. Epidemiology, clinical course, and outcomes of critically ill adults with COVID-19 in New York City: a prospective cohort study. *Lancet*. 2020;395(10239):1763-1770. doi:10.1016/S0140-6736(20)31189-2
7. Ye Q, Wang B, Mao J. The pathogenesis and treatment of the 'Cytokine Storm' in COVID-19. *J Infect*. 2020;80(6):607-613. doi:10.1016/j.jinf.2020.03.037
8. Alberici F, Delbarba E, Manenti C, et al. A single center observational study of the clinical characteristics and short-term outcome of 20 kidney transplant patients admitted for SARS-CoV2 pneumonia. *Kidney Int*. 2020;97(6):1083-1088. doi:10.1016/j.kint.2020.04.002
9. Fernández-Ruiz M, Andrés A, Loinaz C, et al. COVID-19 in solid organ transplant recipients: A single-center case series from Spain. *Am J Transplant*. 2020;20(7):1849-1858. doi:10.1111/ajt.15929
10. Akalin E, Azzi Y, Bartash R, et al. Covid-19 and Kidney Transplantation. *N Engl J Med*. 2020;382(25):2475-2477. doi:10.1056/nejmc2011117
11. Hugo C, Stecher M, Dolff S, Nattermann J, Vehreschild J, Hippchen T, Westhoff T, Bertolo M, Hohenstein B, Hanses F SC. Solid organ transplantation is not a risk factor for COVID-19 disease outcome. *Transpl Int*. 2021;accepted. doi:10.1111/tri.13795
12. Jager KJ, Kramer A, Chesnaye NC, et al. Results from the ERA-EDTA Registry indicate a high mortality due to COVID-19 in dialysis patients and kidney transplant recipients across Europe. *Kidney Int*. 2020;98(6):1540-1548. doi:10.1016/j.kint.2020.09.006
13. Nguyen-Contant P, Embong AK, Kanagaiah P, et al. S Protein-Reactive IgG and Memory B Cell Production after Human SARS-CoV-2 Infection Includes Broad Reactivity to the S2 Subunit. Ellebedy A, Schultz-Cherry S, eds. *MBio*. 2020;11(5). doi:10.1128/mBio.01991-20
14. Murugesan K, Jagannathan P, Pham TD, et al. Interferon-gamma release assay for accurate detection of SARS-CoV-2 T cell response. *Clin Infect Dis*. Published online October 9, 2020. doi:10.1093/cid/ciaa1537
15. Thieme CJ, Anft M, Paniskaki K, et al. Robust T Cell Response Toward Spike, Membrane, and Nucleocapsid SARS-CoV-2 Proteins Is Not Associated with Recovery in Critical COVID-19 Patients. *Cell Reports Med*. 2020;1(6):100092. doi:10.1016/j.xcrm.2020.100092

Prüfplan: Untersuchung der Immunantwort vor/nach COVID-19 Erkrankung oder SARS-CoV-2- Impfung in Dialysepatient\*Innen, Organempfänger\*Innen und medizinischem Personal

## 15. Abkürzungsverzeichnis:

|            |                                                 |
|------------|-------------------------------------------------|
| SARS-CoV-2 | Severe Acute Respiratory Syndrom Corona Virus-2 |
| Covid-19   | durch SARS-CoV-2 verursachte Erkrankung         |
| ml         | Milliliter                                      |
| NTx        | Nierentransplantation                           |
| IgG        | Immunglobulin G                                 |
| S1         | SARS-CoV-2-Spike-Protein-Untereinheit S1        |
| RBD        | SARS-CoV-2-neuartige Rezeptorbindungsdomäne     |
| S2         | SARS-CoV-2-Spike-Protein-Untereinheit S2        |
| N          | SARS-CoV-2-Protein Nukleokapsid                 |
| IGRA       | Interferon- $\gamma$ -Release-Assays            |
| ELISA      | Enzym-Linked-Immuno-Sorbent-Assay               |
| eCRF       | elektronischer Prüfbogen                        |

---

## 16. Anhang

---

### 16.1. LISTE BETEILIGTER EINRICHTUNGEN:

Abteilung für Nephrologie  
Medizinische Klinik und Poliklinik III  
Universitätsklinikum Carl Gustav Carus Dresden  
Fetscherstraße 74  
01307 Dresden

DRK-Blutspendedienst Nord-Ost gemeinnützige GmbH  
Blasewitzer Straße 68 / 70  
01307 Dresden

Institutsleiter des Instituts für Transfusionsmedizin Plauen  
Röntgenstraße 2a  
08529 Plauen

Fachabteilung Nephrologie  
Medizinische Klinik III  
Universitätsklinikum Leipzig  
Liebigstraße 18  
04103 Leipzig

KfH-Nierenzentrum Dresden  
Fetscherstraße 74  
01307 Dresden

KfH-Nierenzentrum Leipzig  
Liebigstraße 18  
04103 Leipzig

KfH-Nierenzentrum Leipzig am Klinikum St. Georg  
Delitzscher Str. 141  
04129 Leipzig



Prüfplan: Untersuchung der Immunantwort vor/nach COVID-19 Erkrankung oder SARS-CoV-2- Impfung in Dialysepatient\*Innen, Organempfänger\*Innen und medizinischem Personal

PHV-Dialysezentrum Dresden Friedrichstadt  
Waltherstraße 22  
01067 Dresden

Nieren-, Hochdruck- und Rheuma-Zentrum Dresden  
Caspar-David-Friedrich-Straße 10a  
01217 Dresden

PHV-Dialysepraxis Dresden-Johannstadt  
Gutenbergstraße 5  
01307 Dresden

Via medis Nierenzentrum Dresden MVZ GmbH  
Heinrich-Cotta-Straße 12  
01324 Dresden

PHV-Dialysezentrum Großenhain  
Bobersbergstraße 2  
01558 Großenhain

Nephrologische Fachambulanz Großenhain  
Am Bobersberg 4  
01558 Großenhain

Via medis Nierenzentrum Riesa MVZ GmbH  
Robert-Koch-Straße 30  
01589 Riesa

PHV-Dialysezentrum Meißen  
Many-Jost-Weg 1  
01662 Meißen

Dialysezentrum Freital  
Bürgerstraße 7  
01705 Freital

Dialyse Heidenau  
Dresdner Straße 45  
01809 Heidenau

Dialyse- und Nierenambulanz Sebnitz  
Götzingerstraße 8  
01855 Sebnitz

KfH-Nierenzentrum Bischofswerda  
Kamenzer Straße 51  
01877 Bischofswerda

KfH-Nierenzentrum Bautzen  
Schäfferstraße 27  
02625 Bautzen

Gemeinschaftspraxis Dres. Lüthke/Neubert (Dialysezentrum Löbau)

Prüfplan: Untersuchung der Immunantwort vor/nach COVID-19 Erkrankung oder SARS-CoV-2- Impfung in Dialysepatient\*Innen, Organempfänger\*Innen und medizinischem Personal

Theaterplatz 2  
02708 Löbau

Dialysepraxis Zittau  
Theaterring 8  
02763 Zittau

KfH-Nierenzentrum Görlitz  
Girbigsdorfer Straße 26  
02828 Görlitz

Dialyse-Weißwasser  
Albert-Schweitzer-Ring 32  
02943 Weißwasser

Nephrologisches Zentrum Hoyerswerda  
Liselotte-Herrmann-Straße 13  
02977 Hoyerswerda

KfH-Nierenzentrum Finsterwalde  
Zum Fichteplatz 2  
03238 Finsterwalde

PHV-Dialysezentrum Leipzig-Wiederitzsch  
Seehausener Str. 35  
04158 Leipzig-Wiederitzsch

KfH-Nierenzentrum Markkleeberg  
Koburger Str. 31  
04416 Markkleeberg

Dialyse Borna  
Brauhausstr. 5  
04552 Borna

KfH-Nierenzentrum Grimma  
Kleiststr. 5  
04668 Grimma

Nephrocare Döbeln GmbH  
Grimmaische Str. 23  
04720 Döbeln

Nephrologisches Zentrum Zwickau  
Hilfegottesschachtstraße 3  
08056 Zwickau

Gemeinschaftspraxis für Innere Medizin, Nephrologie und Dialyse Rodewisch  
Goethestr. 42  
08228 Rodewisch

KfH-Nierenzentrum Aue

Prüfplan: Untersuchung der Immunantwort vor/nach COVID-19 Erkrankung oder SARS-CoV-2- Impfung in Dialysepatient\*Innen, Organempfänger\*Innen und medizinischem Personal

Albert-Schweitzer-Straße 33  
08280 Aue

KfH-Nierenzentrum Plauen  
Röntgenstraße 6  
08529 Plauen

KfH-Nierenzentrum Chemnitz  
Bürgerstraße 2  
09113 Chemnitz

Dialysezentrum Chemnitz  
Forststraße 22  
09130 Chemnitz

Dialysezentrum Annaberg  
Geyersdorfer Hauptstraße 4a  
09456 Annaberg-Buchholz

Dialysepraxis Freiberg  
Franz-Kögler-Ring 135  
09599 Freiberg

Dialysezentrum Frankenberg  
Max-Kästner-Str. 32  
09669 Frankenberg

16.2. STUDIENSKIZZE:

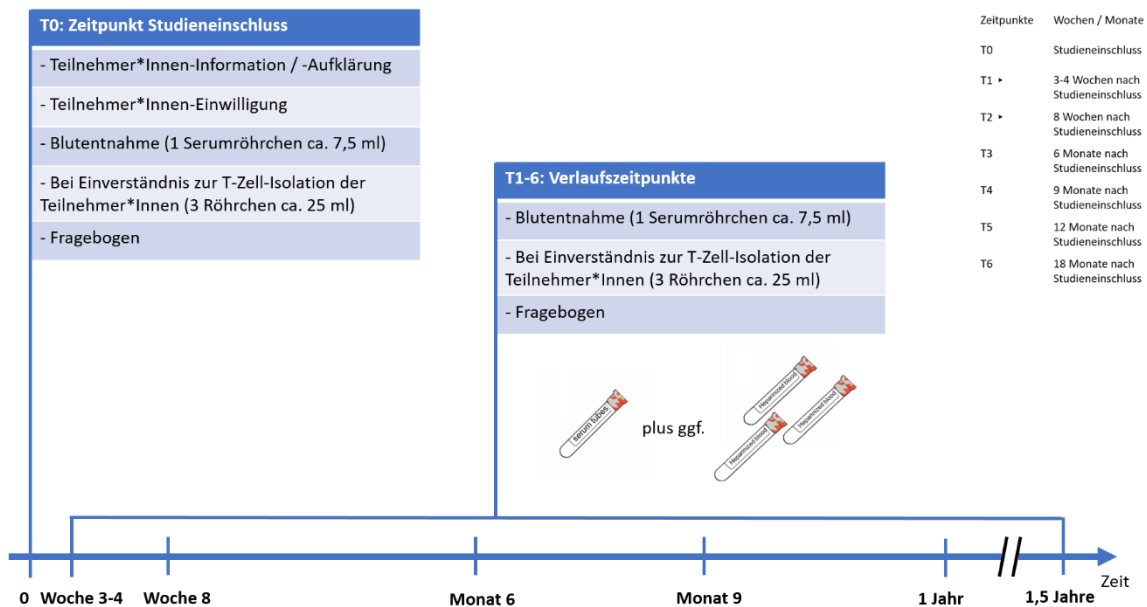

Supplement: mmc2.pdf [file mmc2.pdf]
